# Supplementary material for: Photophysics of xanthine: computational study of the radiationless decay mechanisms
Source: Royal Society of Chemistry journal article supplement (doi:10.1039/b913131k), 2009-01-01
Supplement: b913131k.pdf [file b913131k.pdf]

**Photophysics of xanthine:  
Computational study of the radiationless decay mechanisms**

**Electronic Supplementary Information**

Shohei Yamazaki,<sup>\*,a</sup> Andrzej L. Sobolewski<sup>b</sup> and Wolfgang Domcke<sup>a</sup>

*<sup>a</sup>Department of Chemistry, Technical University of Munich,  
D-85747 Garching, Germany*

*<sup>b</sup>Institute of Physics, Polish Academy of Sciences,  
PL-02668 Warsaw, Poland*

E-mail: shohei.yamazaki@ch.tum.de

Table S1: Cartesian coordinates of ground-state minimum geometries of the 7H-diketo tautomer of xanthine, optimized with the CC2 method (in au)

| Atom | x            | y           | z            | Atom | x            | y           | z            |
|------|--------------|-------------|--------------|------|--------------|-------------|--------------|
|      |              | cc-pVDZ     |              |      |              | aug-cc-pVDZ |              |
| N    | -1.506943383 | 0.000000000 | -2.852316841 | N    | -1.513220604 | 0.000000000 | -2.862416966 |
| C    | 1.088264632  | 0.000000000 | -3.463624361 | C    | 1.083464207  | 0.000000000 | -3.462050347 |
| N    | 2.673501237  | 0.000000000 | -1.360325282 | N    | 2.676885464  | 0.000000000 | -1.365923256 |
| C    | 1.725666868  | 0.000000000 | 1.068307761  | C    | 1.726465103  | 0.000000000 | 1.065048610  |
| C    | -0.870230881 | 0.000000000 | 1.504918812  | C    | -0.871847658 | 0.000000000 | 1.509381756  |
| C    | -2.746799325 | 0.000000000 | -0.480357808 | C    | -2.735074277 | 0.000000000 | -0.478721059 |
| N    | -1.094382500 | 0.000000000 | 4.108991415  | N    | -1.094770763 | 0.000000000 | 4.117625954  |
| C    | 1.310740691  | 0.000000000 | 5.063729805  | C    | 1.314057901  | 0.000000000 | 5.078724698  |
| N    | 3.100228854  | 0.000000000 | 3.260901496  | N    | 3.100512450  | 0.000000000 | 3.263861532  |
| O    | 1.859727326  | 0.000000000 | -5.652896046 | O    | 1.859310428  | 0.000000000 | -5.667397332 |
| O    | -5.070761794 | 0.000000000 | -0.266856376 | O    | -5.075033607 | 0.000000000 | -0.263761090 |
| H    | 1.684289206  | 0.000000000 | 7.089028967  | H    | 1.690914484  | 0.000000000 | 7.099285236  |
| H    | -2.664488456 | 0.000000000 | -4.395852653 | H    | -2.673403528 | 0.000000000 | -4.402129387 |
| H    | 4.566435511  | 0.000000000 | -1.691848048 | H    | 4.568272406  | 0.000000000 | -1.703573287 |
| H    | -2.750549869 | 0.000000000 | 5.083133709  | H    | -2.746307818 | 0.000000000 | 5.097661530  |
|      |              | cc-pVTZ     |              |      |              | aug-cc-pVTZ |              |
| N    | -1.503159981 | 0.000000000 | -2.836558970 | N    | -1.504514141 | 0.000000000 | -2.838535510 |
| C    | 1.074122935  | 0.000000000 | -3.441673424 | C    | 1.073137809  | 0.000000000 | -3.439234055 |
| N    | 2.655555362  | 0.000000000 | -1.358371789 | N    | 2.657821447  | 0.000000000 | -1.359459637 |
| C    | 1.712729529  | 0.000000000 | 1.055310451  | C    | 1.714452018  | 0.000000000 | 1.054724670  |
| C    | -0.860477791 | 0.000000000 | 1.498212976  | C    | -0.859788089 | 0.000000000 | 1.498010516  |
| C    | -2.718827158 | 0.000000000 | -0.470835408 | C    | -2.714379103 | 0.000000000 | -0.470477926 |
| N    | -1.082468750 | 0.000000000 | 4.087374279  | N    | -1.083422496 | 0.000000000 | 4.086659139  |
| C    | 1.308283762  | 0.000000000 | 5.034204955  | C    | 1.307254147  | 0.000000000 | 5.037891510  |
| N    | 3.077363001  | 0.000000000 | 3.234997758  | N    | 3.075908417  | 0.000000000 | 3.236626481  |
| O    | 1.837594469  | 0.000000000 | -5.624396887 | O    | 1.836249908  | 0.000000000 | -5.627089002 |
| O    | -5.032950622 | 0.000000000 | -0.252915628 | O    | -5.033706640 | 0.000000000 | -0.252452452 |
| H    | 1.684455710  | 0.000000000 | 7.033551857  | H    | 1.681460799  | 0.000000000 | 7.039144122  |
| H    | -2.656265409 | 0.000000000 | -4.363693365 | H    | -2.658333215 | 0.000000000 | -4.367880179 |
| H    | 4.532964131  | 0.000000000 | -1.690237452 | H    | 4.536893558  | 0.000000000 | -1.695091962 |
| H    | -2.722922432 | 0.000000000 | 5.056995915  | H    | -2.725392814 | 0.000000000 | 5.057847595  |

Table S2: Cartesian coordinates of ground-state minimum geometries of the 9H-diketo tautomer of xanthine, optimized with the CC2 method (in au)

| Atom | x            | y           | z            | Atom | x            | y           | z            |
|------|--------------|-------------|--------------|------|--------------|-------------|--------------|
|      |              | cc-pVDZ     |              |      |              | aug-cc-pVDZ |              |
| N    | -1.508176328 | 0.000000000 | -2.838451627 | N    | -1.509045638 | 0.000000000 | -2.853154200 |
| C    | 1.045406984  | 0.000000000 | -3.501127654 | C    | 1.050607237  | 0.000000000 | -3.493484921 |
| N    | 2.673397435  | 0.000000000 | -1.405872332 | N    | 2.678033657  | 0.000000000 | -1.401049746 |
| C    | 1.696669009  | 0.000000000 | 1.003421302  | C    | 1.694615230  | 0.000000000 | 1.010422194  |
| C    | -0.870654500 | 0.000000000 | 1.595774010  | C    | -0.877265843 | 0.000000000 | 1.592561126  |
| C    | -2.741279332 | 0.000000000 | -0.426021068 | C    | -2.734213294 | 0.000000000 | -0.435176215 |
| N    | -1.226346802 | 0.000000000 | 4.196614810  | N    | -1.232914117 | 0.000000000 | 4.199355680  |
| C    | 1.092150797  | 0.000000000 | 5.136057341  | C    | 1.085117787  | 0.000000000 | 5.154571346  |
| N    | 2.955467623  | 0.000000000 | 3.269451375  | N    | 2.952186873  | 0.000000000 | 3.282379156  |
| O    | 1.833762889  | 0.000000000 | -5.684477414 | O    | 1.849764227  | 0.000000000 | -5.690743611 |
| O    | -5.057041107 | 0.000000000 | -0.279636096 | O    | -5.064133824 | 0.000000000 | -0.295242320 |
| H    | 1.591443968  | 0.000000000 | 7.134396030  | H    | 1.572939067  | 0.000000000 | 7.151580347  |
| H    | -2.704873820 | 0.000000000 | -4.352257425 | H    | -2.701465874 | 0.000000000 | -4.368251445 |
| H    | 4.551160309  | 0.000000000 | -1.806301575 | H    | 4.555102521  | 0.000000000 | -1.801891653 |
| H    | 4.856508835  | 0.000000000 | 3.544687719  | H    | 4.851655811  | 0.000000000 | 3.558094536  |
|      |              | cc-pVTZ     |              |      |              | aug-cc-pVTZ |              |
| N    | -1.497435839 | 0.000000000 | -2.828895343 | N    | -1.496417136 | 0.000000000 | -2.832258985 |
| C    | 1.042443694  | 0.000000000 | -3.472808916 | C    | 1.044760049  | 0.000000000 | -3.468729895 |
| N    | 2.655991454  | 0.000000000 | -1.390905432 | N    | 2.658478373  | 0.000000000 | -1.388364877 |
| C    | 1.678229221  | 0.000000000 | 1.001605104  | C    | 1.677751665  | 0.000000000 | 1.004028478  |
| C    | -0.868749199 | 0.000000000 | 1.582372318  | C    | -0.870789433 | 0.000000000 | 1.580911083  |
| C    | -2.717782193 | 0.000000000 | -0.429655613 | C    | -2.715146560 | 0.000000000 | -0.432634751 |
| N    | -1.218579632 | 0.000000000 | 4.168978849  | N    | -1.221150141 | 0.000000000 | 4.167718282  |
| C    | 1.079254221  | 0.000000000 | 5.110308894  | C    | 1.074984337  | 0.000000000 | 5.115240848  |
| N    | 2.931583028  | 0.000000000 | 3.253450639  | N    | 2.928872732  | 0.000000000 | 3.257322977  |
| O    | 1.831307369  | 0.000000000 | -5.646665866 | O    | 1.836149810  | 0.000000000 | -5.646732817 |
| O    | -5.023204383 | 0.000000000 | -0.286990671 | O    | -5.025044318 | 0.000000000 | -0.294265787 |
| H    | 1.566153136  | 0.000000000 | 7.085920535  | H    | 1.559993763  | 0.000000000 | 7.092915502  |
| H    | -2.683123061 | 0.000000000 | -4.331106705 | H    | -2.681816238 | 0.000000000 | -4.337472295 |
| H    | 4.519376140  | 0.000000000 | -1.784535035 | H    | 4.524031510  | 0.000000000 | -1.782436853 |
| H    | 4.816333615  | 0.000000000 | 3.526427013  | H    | 4.815414585  | 0.000000000 | 3.532042376  |

Table S3: Cartesian coordinates of  $^1\pi\pi^*$  minimum geometries of the 7H-diketo tautomer of xanthine, optimized with the CC2 and CASSCF methods (in au)

| Atom           | x            | y            | z            | Atom                            | x            | y            | z            |
|----------------|--------------|--------------|--------------|---------------------------------|--------------|--------------|--------------|
| CC2/cc-pVDZ    |              |              |              | CC2/aug-cc-pVDZ                 |              |              |              |
| N              | -1.479328010 | -0.024813427 | -2.944066610 | N                               | -1.484308093 | 0.141071939  | -2.963983443 |
| C              | 1.056132873  | 0.004248399  | -3.468633921 | C                               | 1.052056648  | -0.002382258 | -3.458154007 |
| N              | 2.654320251  | 0.051387124  | -1.275707230 | N                               | 2.663659037  | -0.086192603 | -1.282924828 |
| C              | 1.766577397  | 0.039907141  | 1.125149111  | C                               | 1.772069814  | 0.131475560  | 1.120564442  |
| C              | -0.951674692 | 0.056890272  | 1.493442781  | C                               | -0.941289370 | 0.048609924  | 1.486263503  |
| C              | -2.760831101 | 0.014340016  | -0.500984996 | C                               | -2.752124609 | -0.095354814 | -0.513395886 |
| N              | -1.232883481 | 0.165755201  | 4.106795845  | N                               | -1.185642464 | 0.055593426  | 4.066539959  |
| C              | 1.319403166  | -0.160333375 | 5.129897305  | C                               | 1.313297058  | -0.095970859 | 5.132072852  |
| N              | 3.137112102  | -0.045094537 | 3.266771689  | N                               | 3.103889760  | 0.028427796  | 3.314383511  |
| O              | 2.045941512  | -0.023404339 | -5.573544585 | O                               | 2.060783984  | -0.040386781 | -5.578733136 |
| O              | -5.119061353 | -0.039257225 | -0.396481633 | O                               | -5.150572073 | -0.050363130 | -0.369697470 |
| H              | 1.699493901  | 0.277805894  | 7.112676011  | H                               | 1.641015265  | -0.024582580 | 7.158723891  |
| H              | -2.638487715 | -0.070307208 | -4.485672856 | H                               | -2.634201789 | 0.137334030  | -4.511071887 |
| H              | 4.557761428  | 0.009563592  | -1.625323141 | H                               | 4.555129517  | -0.227645555 | -1.655670228 |
| H              | -2.747353308 | -0.732822256 | 4.905997437  | H                               | -2.852944743 | -0.212481639 | 4.985019071  |
| CASSCF/cc-pVDZ |              |              |              | CASSCF/aug-cc-pVDZ <sup>a</sup> |              |              |              |
| N              | -1.480555544 | 0.118385908  | -2.917547117 | N                               | -1.450076050 | 0.000000000  | -2.938404108 |
| C              | 1.053192568  | 0.006227787  | -3.402347845 | C                               | 1.095858171  | 0.000000000  | -3.389526015 |
| N              | 2.614936279  | -0.057458071 | -1.261534754 | N                               | 2.641010543  | 0.000000000  | -1.248524122 |
| C              | 1.746363526  | 0.079955987  | 1.096924866  | C                               | 1.709185479  | 0.000000000  | 1.102848810  |
| C              | -0.947333516 | 0.274948613  | 1.508729749  | C                               | -0.968965265 | 0.000000000  | 1.481083403  |
| C              | -2.676184828 | 0.035145492  | -0.541360277 | C                               | -2.686858570 | 0.000000000  | -0.579817354 |
| N              | -1.280348934 | -0.288474742 | 4.121545491  | N                               | -1.262418292 | 0.000000000  | 4.057790153  |
| C              | 1.248239044  | 0.214426413  | 5.029987835  | C                               | 1.215619573  | 0.000000000  | 5.131219742  |
| N              | 3.133930665  | -0.137898477 | 3.179019674  | N                               | 3.096090895  | 0.000000000  | 3.258505819  |
| O              | 1.957683133  | -0.046862081 | -5.470930810 | O                               | 2.014848812  | 0.000000000  | -5.463905046 |
| O              | -4.953732103 | -0.125927922 | -0.407706128 | O                               | -4.976480659 | 0.000000000  | -0.471073130 |
| H              | 1.669980676  | -0.136429391 | 6.996828392  | H                               | 1.565611277  | 0.000000000  | 7.120306306  |
| H              | -2.604503883 | 0.098055333  | -4.438434482 | H                               | -2.548792857 | 0.000000000  | -4.470683786 |
| H              | 4.472777020  | -0.253663602 | -1.580893323 | H                               | 4.505881455  | 0.000000000  | -1.550555037 |
| H              | -2.558529382 | 0.835771390  | 4.964480643  | H                               | -2.890239129 | 0.000000000  | 4.985687313  |

<sup>a</sup> Optimized with  $C_s$  symmetry constraint.

Table S4: Cartesian coordinates of  $^1\pi\pi^*$  minimum geometries of the 9H-diketo tautomer of xanthine, optimized with the CC2 and CASSCF methods (in au)

| Atom           | x            | y            | z            | Atom               | x            | y            | z            |
|----------------|--------------|--------------|--------------|--------------------|--------------|--------------|--------------|
| CC2/cc-pVDZ    |              |              |              | CC2/aug-cc-pVDZ    |              |              |              |
| N              | -1.210072172 | 0.794028478  | -2.954753890 | N                  | -1.298752768 | 0.661431356  | -2.953613137 |
| C              | 1.229668752  | -0.052489372 | -3.330262328 | C                  | 1.169607389  | -0.051070882 | -3.368157980 |
| N              | 2.625207807  | -0.164709260 | -1.030960545 | N                  | 2.624225114  | -0.188024712 | -1.102645601 |
| C              | 1.672382355  | 0.897035144  | 1.172901814  | C                  | 1.707617017  | 0.806010151  | 1.131484073  |
| C              | -1.099732536 | 0.244230407  | 1.495785476  | C                  | -1.058091809 | 0.213704743  | 1.514458574  |
| C              | -2.693413830 | 0.155974625  | -0.672140320 | C                  | -2.700783543 | 0.098832703  | -0.617419351 |
| N              | -1.471857365 | -0.509626226 | 3.936696566  | N                  | -1.421681128 | -0.406542376 | 3.995448724  |
| C              | 0.741337486  | -0.376434938 | 5.113410305  | C                  | 0.825781068  | -0.302021017 | 5.133695367  |
| N              | 2.784393055  | 0.175062309  | 3.519401264  | N                  | 2.837689595  | 0.124109251  | 3.471227310  |
| O              | 2.253284626  | -0.634381619 | -5.342380116 | O                  | 2.205021769  | -0.498906685 | -5.426328700 |
| O              | -4.993845857 | -0.273134989 | -0.889898442 | O                  | -5.042888978 | -0.237426275 | -0.747521012 |
| H              | 1.020591150  | -0.774782130 | 7.118883965  | H                  | 1.129624053  | -0.628016983 | 7.144079702  |
| H              | -2.283913496 | 0.721262725  | -4.560883493 | H                  | -2.404204416 | 0.630280260  | -4.536045399 |
| H              | 4.323775840  | -1.101122646 | -1.108579545 | H                  | 4.388146399  | -0.972338504 | -1.280670298 |
| H              | 4.321337149  | 1.116773026  | 4.211811316  | H                  | 4.502092065  | 0.882856134  | 4.068528902  |
| CASSCF/cc-pVDZ |              |              |              | CASSCF/aug-cc-pVDZ |              |              |              |
| N              | -1.417183108 | 0.236327747  | -2.936382792 | N                  | -1.415732350 | 0.215874740  | -2.945290161 |
| C              | 1.142534617  | -0.070744553 | -3.371577417 | C                  | 1.147086315  | -0.069147530 | -3.366615928 |
| N              | 2.650594894  | -0.156068111 | -1.241118087 | N                  | 2.656980299  | -0.153333266 | -1.236762756 |
| C              | 1.753759665  | 0.676160222  | 1.087004073  | C                  | 1.750390183  | 0.664617476  | 1.091585346  |
| C              | -0.964917495 | 0.244796114  | 1.508722809  | C                  | -0.970828039 | 0.239372221  | 1.507390967  |
| C              | -2.677470324 | 0.099813330  | -0.618307914 | C                  | -2.678458664 | 0.096621092  | -0.626318793 |
| N              | -1.492787325 | -0.264148425 | 4.017131932  | N                  | -1.497931732 | -0.262182010 | 4.019406299  |
| C              | 0.962846300  | -0.358433362 | 5.175047525  | C                  | 0.956855129  | -0.350053775 | 5.187001029  |
| N              | 2.893310343  | -0.014871368 | 3.378781947  | N                  | 2.890826488  | -0.015756457 | 3.387677459  |
| O              | 1.993231713  | -0.259464373 | -5.458114171 | O                  | 2.007007166  | -0.247246975 | -5.457674619 |
| O              | -4.942107478 | -0.091657219 | -0.506802473 | O                  | -4.947529657 | -0.081594206 | -0.522433425 |
| H              | 1.174803433  | 0.390084186  | 7.063836771  | H                  | 1.164833233  | 0.409226328  | 7.067234606  |
| H              | -2.498468013 | 0.135939707  | -4.484693818 | H                  | -2.487855467 | 0.126700614  | -4.494094532 |
| H              | 4.504739928  | -0.159598117 | -1.605187253 | H                  | 4.506452971  | -0.155487296 | -1.598665384 |
| H              | 4.442484439  | 0.919464442  | 3.930585534  | H                  | 4.444160525  | 0.904312774  | 3.934414952  |

Table S5: Cartesian coordinates of  $^1n\pi^*$  minimum geometries of the 7H-diketo tautomer of xanthine, optimized with the CC2 and CASSCF methods (in au)

| Atom           | x            | y            | z            | Atom               | x            | y            | z            |
|----------------|--------------|--------------|--------------|--------------------|--------------|--------------|--------------|
| CC2/cc-pVDZ    |              |              |              | CC2/aug-cc-pVDZ    |              |              |              |
| N              | -1.410081543 | -0.208399151 | -2.944426469 | N                  | -1.436414803 | -0.151716543 | -2.952573611 |
| C              | 1.218112376  | -0.005637828 | -3.413214064 | C                  | 1.191868028  | -0.006811721 | -3.426847596 |
| N              | 2.706647323  | -0.110564800 | -1.260597974 | N                  | 2.699641363  | -0.054833316 | -1.281358219 |
| C              | 1.711814013  | -0.047939396 | 1.177397734  | C                  | 1.719389623  | -0.041327478 | 1.162931397  |
| C              | -0.966603138 | 0.012397649  | 1.519816748  | C                  | -0.955422304 | 0.048072747  | 1.528874682  |
| C              | -2.526068615 | 0.040810282  | -0.542592463 | C                  | -2.509999404 | 0.141729655  | -0.536463642 |
| N              | -1.244460017 | 0.089153355  | 4.135690959  | N                  | -1.222849239 | 0.054637042  | 4.146874633  |
| C              | 1.184199100  | 0.038065617  | 5.167663337  | C                  | 1.214725211  | 0.015697129  | 5.176370372  |
| N              | 2.996745030  | -0.031815919 | 3.394789368  | N                  | 3.013618147  | -0.047162374 | 3.379330335  |
| O              | 2.053904028  | 0.173267487  | -5.574864469 | O                  | 2.032416510  | 0.096769062  | -5.608687097 |
| O              | -5.235346673 | 0.004595965  | -0.666390439 | O                  | -5.249653745 | -0.062810203 | -0.598587890 |
| H              | 1.500473890  | 0.071693922  | 7.200808298  | H                  | 1.543809510  | 0.002493890  | 7.203649682  |
| H              | -2.477578173 | 0.249586736  | -4.482695299 | H                  | -2.510685480 | 0.268770106  | -4.495282749 |
| H              | 4.603918602  | 0.026764571  | -1.542382835 | H                  | 4.597783885  | -0.002319830 | -1.581493097 |
| H              | -2.900030749 | 0.015116288  | 5.100254065  | H                  | -2.873455016 | 0.083269418  | 5.120975414  |
| CASSCF/cc-pVDZ |              |              |              | CASSCF/aug-cc-pVDZ |              |              |              |
| N              | -1.464429632 | 0.095466229  | -2.923323749 | N                  | -1.467892750 | 0.101317198  | -2.927804584 |
| C              | 1.115165827  | -0.001116560 | -3.399408883 | C                  | 1.112704486  | 0.001763763  | -3.397313442 |
| N              | 2.647111516  | -0.163335493 | -1.313690055 | N                  | 2.648341317  | -0.167247987 | -1.316854932 |
| C              | 1.655406558  | -0.070871188 | 1.101713578  | C                  | 1.652340805  | -0.076811036 | 1.099391702  |
| C              | -0.894799462 | 0.166861747  | 1.506480110  | C                  | -0.892869138 | 0.169339182  | 1.506827835  |
| C              | -2.606023231 | 0.535919154  | -0.550782330 | C                  | -2.606278882 | 0.548044916  | -0.553193823 |
| N              | -1.140246444 | 0.219901854  | 4.095192299  | N                  | -1.139611704 | 0.226785680  | 4.098205114  |
| C              | 1.232181734  | -0.013115194 | 5.058409949  | C                  | 1.232707741  | -0.010472620 | 5.063518579  |
| N              | 2.969840858  | -0.175704942 | 3.295169368  | N                  | 2.968552843  | -0.182686155 | 3.298823591  |
| O              | 1.922328836  | 0.039998367  | -5.515176463 | O                  | 1.920877502  | 0.041022172  | -5.520676679 |
| O              | -4.993111901 | -0.516376707 | -0.418337746 | O                  | -4.987042083 | -0.531804340 | -0.413869354 |
| H              | 1.590904433  | -0.068815723 | 7.059008386  | H                  | 1.591412155  | -0.064937915 | 7.059888620  |
| H              | -2.453810225 | 0.583637839  | -4.457979468 | H                  | -2.452256638 | 0.584009286  | -4.460970087 |
| H              | 4.506365546  | -0.255184261 | -1.607148972 | H                  | 4.502766358  | -0.259179858 | -1.614099798 |
| H              | -2.740689960 | 0.270561552  | 5.084696276  | H                  | -2.732710994 | 0.304311941  | 5.090150544  |

Table S6: Cartesian coordinates of  $^1n\pi^*$  minimum geometries of the 9H-diketo tautomer of xanthine, optimized with the CC2 and CASSCF methods (in au)

| Atom           | x            | y            | z            | Atom               | x            | y            | z            |
|----------------|--------------|--------------|--------------|--------------------|--------------|--------------|--------------|
| CC2/cc-pVDZ    |              |              |              | CC2/aug-cc-pVDZ    |              |              |              |
| N              | -1.450275584 | 0.247144580  | -2.870396800 | N                  | -1.466798881 | 0.188444503  | -2.886744635 |
| C              | 1.144266935  | -0.060960767 | -3.436314819 | C                  | 1.129654038  | -0.063025578 | -3.441834693 |
| N              | 2.685961518  | -0.130776060 | -1.316173155 | N                  | 2.687126518  | -0.113246832 | -1.324414603 |
| C              | 1.801316036  | 0.623728492  | 1.089033637  | C                  | 1.805375307  | 0.611715862  | 1.086219069  |
| C              | -0.911975169 | 0.357017435  | 1.570687597  | C                  | -0.907136277 | 0.360725743  | 1.572367299  |
| C              | -2.466767488 | 0.133138504  | -0.450801973 | C                  | -2.451250591 | 0.117846587  | -0.452762471 |
| N              | -1.387297020 | -0.053547523 | 4.169696285  | N                  | -1.374159353 | -0.030613895 | 4.176338235  |
| C              | 0.889624262  | -0.274518316 | 5.132762037  | C                  | 0.908381488  | -0.274539589 | 5.147025640  |
| N              | 2.890099886  | -0.187035635 | 3.399601765  | N                  | 2.894037370  | -0.190554078 | 3.397300187  |
| O              | 1.901548628  | -0.228490858 | -5.629551628 | O                  | 1.906384985  | -0.203813976 | -5.646830664 |
| O              | -5.135586043 | -0.251893702 | -0.575731361 | O                  | -5.166399835 | -0.233816574 | -0.541478710 |
| H              | 1.276683804  | -0.544659358 | 7.144308988  | H                  | 1.295552326  | -0.538925693 | 7.154343482  |
| H              | -2.619964265 | 0.182705635  | -4.398758197 | H                  | -2.637256807 | 0.232606650  | -4.413912047 |
| H              | 4.553800046  | 0.021884423  | -1.764647562 | H                  | 4.551849030  | 0.028495976  | -1.780918291 |
| H              | 4.630097042  | 0.415743742  | 3.972358139  | H                  | 4.678638732  | 0.283212491  | 3.938397971  |
| CASSCF/cc-pVDZ |              |              |              | CASSCF/aug-cc-pVDZ |              |              |              |
| N              | -1.435555490 | 0.375001055  | -2.903237911 | N                  | -1.430848539 | 0.387281135  | -2.910800099 |
| C              | 1.093277927  | 0.036411469  | -3.406354312 | C                  | 1.098545483  | 0.039126565  | -3.399684937 |
| N              | 2.681590282  | -0.034252108 | -1.323363616 | N                  | 2.687659093  | -0.032669881 | -1.317218433 |
| C              | 1.617517094  | -0.077773998 | 1.062750674  | C                  | 1.613095204  | -0.097725531 | 1.068134967  |
| C              | -0.891137467 | 0.195784102  | 1.556907447  | C                  | -0.895419891 | 0.173456910  | 1.553453007  |
| C              | -2.627807527 | 0.592551539  | -0.519036881 | C                  | -2.623328276 | 0.593572054  | -0.525835587 |
| N              | -1.300560651 | 0.221366754  | 4.134923008  | N                  | -1.308316253 | 0.221507099  | 4.136218019  |
| C              | 0.927981707  | -0.023507915 | 5.128949407  | C                  | 0.919273516  | -0.010731881 | 5.137924744  |
| N              | 2.811127811  | -0.189992788 | 3.343942316  | N                  | 2.806127707  | -0.183165191 | 3.354777263  |
| O              | 1.897138708  | -0.148456470 | -5.514635858 | O                  | 1.908697996  | -0.147869398 | -5.513153949 |
| O              | -4.898636575 | -0.686258758 | -0.497640799 | O                  | -4.901007848 | -0.685808642 | -0.517939872 |
| H              | 1.334471480  | -0.113712569 | 7.120145355  | H                  | 1.318879353  | -0.090364291 | 7.126575416  |
| H              | -2.474229044 | 0.679281228  | -4.450970533 | H                  | -2.462391297 | 0.687495708  | -4.457508071 |
| H              | 4.391684729  | -0.755054147 | -1.661201193 | H                  | 4.379293601  | -0.785544117 | -1.656550575 |
| H              | 4.657243488  | -0.353018702 | 3.673539568  | H                  | 4.646405673  | -0.352969444 | 3.690407801  |

Table S7: Cartesian coordinates of  $^1\pi\sigma^*$  minimum geometries of the 7H- and 9H-diketo tautomers of xanthine, optimized with the CC2 and CASSCF methods (in au)

| Atom                       | x            | y           | z            | Atom                          | x            | y           | z            |
|----------------------------|--------------|-------------|--------------|-------------------------------|--------------|-------------|--------------|
| 7H-diketo, CC2/aug-cc-pVDZ |              |             |              | 7H-diketo, CASSCF/aug-cc-pVDZ |              |             |              |
| N                          | -1.502951093 | 0.000000000 | -2.909563195 | N                             | -1.471202791 | 0.000000000 | -2.901112055 |
| C                          | 1.077256721  | 0.000000000 | -3.445120100 | C                             | 1.098261883  | 0.000000000 | -3.376528129 |
| N                          | 2.684984459  | 0.000000000 | -1.267033000 | N                             | 2.676543426  | 0.000000000 | -1.255165851 |
| C                          | 1.769188100  | 0.000000000 | 1.093424161  | C                             | 1.761410621  | 0.000000000 | 1.095586664  |
| C                          | -0.923543880 | 0.000000000 | 1.514876256  | C                             | -0.922302701 | 0.000000000 | 1.523476300  |
| C                          | -2.770774380 | 0.000000000 | -0.549984774 | C                             | -2.727230342 | 0.000000000 | -0.591825482 |
| N                          | -1.167453332 | 0.000000000 | 4.044110079  | N                             | -1.175262725 | 0.000000000 | 4.012313348  |
| C                          | 1.275759541  | 0.000000000 | 5.056533019  | C                             | 1.201952458  | 0.000000000 | 5.013129400  |
| N                          | 3.099852668  | 0.000000000 | 3.305580009  | N                             | 3.014999558  | 0.000000000 | 3.266772463  |
| O                          | 1.993313561  | 0.000000000 | -5.572341610 | O                             | 1.958735729  | 0.000000000 | -5.458447148 |
| O                          | -5.083673270 | 0.000000000 | -0.343847439 | O                             | -4.975561454 | 0.000000000 | -0.407966011 |
| H                          | 1.572949760  | 0.000000000 | 7.090907425  | H                             | 1.491235693  | 0.000000000 | 7.020757708  |
| H                          | -2.637468775 | 0.000000000 | -4.474185536 | H                             | -2.558481709 | 0.000000000 | -4.446768017 |
| H                          | 4.592409906  | 0.000000000 | -1.606722824 | H                             | 4.538918871  | 0.000000000 | -1.579816187 |
| H                          | -2.851623832 | 0.000000000 | 5.075473374  | H                             | -2.810642545 | 0.000000000 | 5.070165591  |
| 9H-diketo, CC2/aug-cc-pVDZ |              |             |              | 9H-diketo, CASSCF/aug-cc-pVDZ |              |             |              |
| N                          | -1.512333691 | 0.000000000 | -2.881972545 | N                             | -1.476205406 | 0.000000000 | -2.891129628 |
| C                          | 1.067519102  | 0.000000000 | -3.460352232 | C                             | 1.090236169  | 0.000000000 | -3.380979105 |
| N                          | 2.711408387  | 0.000000000 | -1.298189034 | N                             | 2.692412986  | 0.000000000 | -1.254545495 |
| C                          | 1.760885642  | 0.000000000 | 1.031332124  | C                             | 1.751055967  | 0.000000000 | 1.049853657  |
| C                          | -0.926870026 | 0.000000000 | 1.579062507  | C                             | -0.934597913 | 0.000000000 | 1.558683296  |
| C                          | -2.763893374 | 0.000000000 | -0.510047008 | C                             | -2.721662633 | 0.000000000 | -0.573280008 |
| N                          | -1.317865652 | 0.000000000 | 4.097617089  | N                             | -1.333071974 | 0.000000000 | 4.033777467  |
| C                          | 1.056006294  | 0.000000000 | 5.095858431  | C                             | 0.961742520  | 0.000000000 | 5.065069781  |
| N                          | 2.944982197  | 0.000000000 | 3.316318610  | N                             | 2.864105321  | 0.000000000 | 3.286133846  |
| O                          | 1.931385084  | 0.000000000 | -5.604488903 | O                             | 1.945977303  | 0.000000000 | -5.459450865 |
| O                          | -5.079786512 | 0.000000000 | -0.322933766 | O                             | -4.974008889 | 0.000000000 | -0.404849655 |
| H                          | 1.471471620  | 0.000000000 | 7.111929166  | H                             | 1.356755534  | 0.000000000 | 7.053660503  |
| H                          | -2.665714990 | 0.000000000 | -4.433928136 | H                             | -2.566366178 | 0.000000000 | -4.434595020 |
| H                          | 4.659219867  | 0.000000000 | -1.577353152 | H                             | 4.575582071  | 0.000000000 | -1.552107879 |
| H                          | 4.929391387  | 0.000000000 | 3.531931487  | H                             | 4.773407131  | 0.000000000 | 3.587715715  |



Table S8: Cartesian coordinates of  $^1\pi\pi^*-\text{S}_0$  conical intersection geometries of the 7H- and 9H-diketo tautomers of xanthine, optimized with the CASSCF/cc-pVDZ method (in au)

| Atom | x                    | y            | z            | Atom | x                    | y            | z            |
|------|----------------------|--------------|--------------|------|----------------------|--------------|--------------|
|      | CI <sub>7H</sub> (1) |              |              |      | CI <sub>7H</sub> (2) |              |              |
| N    | -1.707346489         | -0.192428251 | -2.637756242 | N    | -1.604728222         | -0.157418956 | -2.734379216 |
| C    | 0.763289389          | 0.037630611  | -3.454060258 | C    | 0.901684622          | 0.024394282  | -3.415225556 |
| N    | 2.588959709          | 0.332015555  | -1.574598678 | N    | 2.622970553          | 0.278366906  | -1.431443672 |
| C    | 1.943833396          | 0.218617071  | 0.903527068  | C    | 1.864172911          | 0.218765548  | 1.000183109  |
| C    | -0.673939829         | 0.513833937  | 1.592263470  | C    | -0.795937697         | 0.303389370  | 1.604968337  |
| C    | -2.655978919         | -0.046218185 | -0.161409105 | C    | -2.697817458         | -0.056833160 | -0.307180800 |
| N    | -0.672642874         | 0.962467515  | 4.324903248  | N    | -0.992116790         | 0.678564817  | 4.294990625  |
| C    | 1.216420974          | -0.893923111 | 4.428954847  | C    | 1.178766798          | -0.837038987 | 4.545952670  |
| N    | 3.320275523          | -0.355376690 | 2.868551526  | N    | 3.251586970          | -0.173409833 | 3.032199087  |
| O    | 1.333013416          | -0.061143670 | -5.633207684 | O    | 1.601842607          | -0.059858377 | -5.556723413 |
| O    | -4.874059808         | -0.289868243 | 0.271103455  | O    | -4.944373346         | -0.202970107 | -0.051592466 |
| H    | 0.995158397          | -2.733997480 | 5.295063837  | H    | 1.126164672          | -2.622316660 | 5.540366431  |
| H    | -2.980496458         | -0.424902126 | -4.016035559 | H    | -2.806727600         | -0.347301327 | -4.181591520 |
| H    | 4.377797147          | 0.044449592  | -2.113453733 | H    | 4.449266902          | 0.083141455  | -1.878330557 |
| H    | -2.301680323         | 0.336576555  | 5.088016713  | H    | -0.632504590         | 2.496729114  | 4.753223907  |
|      | CI <sub>9H</sub> (1) |              |              |      | CI <sub>9H</sub> (2) |              |              |
| N    | -1.448742856         | -0.067043666 | -2.798014575 | N    | -1.517939219         | -0.006803575 | -2.764174370 |
| C    | 1.135898821          | -0.157880095 | -3.236585040 | C    | 1.054021242          | -0.124003910 | -3.306175061 |
| N    | 2.682899030          | 0.038541648  | -1.128443951 | N    | 2.644226109          | 0.019080974  | -1.256990363 |
| C    | 1.651483386          | 1.054302476  | 1.114093109  | C    | 1.739023997          | 0.920549845  | 1.067658868  |
| C    | -0.972288637         | 0.376398157  | 1.654835602  | C    | -0.887125290         | 0.413232686  | 1.683964545  |
| C    | -2.732258321         | 0.175701865  | -0.517178717 | C    | -2.710130454         | 0.150437597  | -0.432907062 |
| N    | -1.416137539         | -0.281880835 | 4.034777349  | N    | -1.334695422         | -0.115830280 | 4.125829435  |
| C    | 1.077409229          | -1.191550358 | 4.166591096  | C    | 1.085370611          | -1.163327502 | 4.203832064  |
| N    | 2.923769065          | 0.584575834  | 3.581809519  | N    | 3.120886065          | 0.341721607  | 3.377295921  |
| O    | 1.965176963          | -0.384217682 | -5.323709770 | O    | 1.789651014          | -0.351572738 | -5.429690102 |
| O    | -4.985654656         | 0.143233004  | -0.394274694 | O    | -4.956437272         | 0.067090016  | -0.213511312 |
| H    | 1.417366787          | -3.217176560 | 4.199699047  | H    | 1.325038584          | -3.190505577 | 4.401876400  |
| H    | -2.515281573         | -0.269459231 | -4.347972715 | H    | -2.644656068         | -0.210287558 | -4.270496852 |
| H    | 4.403783194          | 0.656822002  | -1.621788623 | H    | 4.452246491          | 0.343339521  | -1.699073467 |
| H    | 4.628866384          | -0.217411031 | 3.339330374  | H    | 3.311670213          | 1.917271266  | 4.430164403  |

Table S9: Cartesian coordinates of  $^1n\pi^*-S_0$  conical intersection geometries of the 7H-diketo tautomer of xanthine, optimized with the CASSCF/cc-pVDZ method (in au)

| Atom                 | x            | y            | z            | Atom                 | x            | y            | z            |
|----------------------|--------------|--------------|--------------|----------------------|--------------|--------------|--------------|
| CI <sub>7H</sub> (3) |              |              |              | CI <sub>7H</sub> (4) |              |              |              |
| N                    | -1.397393443 | 0.360095662  | -2.911895999 | N                    | -1.432339093 | -0.202982686 | -2.863416195 |
| C                    | 1.224440300  | -0.033283039 | -3.303492603 | C                    | 1.185240658  | -0.008189663 | -3.316288269 |
| N                    | 2.607494885  | -0.561912176 | -1.165288679 | N                    | 2.699188992  | 0.139596414  | -1.212923457 |
| C                    | 1.697126865  | -0.128074214 | 1.239279350  | C                    | 1.771382808  | 0.191796825  | 1.221988617  |
| C                    | -1.071083499 | 0.308764560  | 1.578277913  | C                    | -1.000874802 | 0.583170312  | 1.562502760  |
| C                    | -2.371619620 | 0.120973383  | -0.495556536 | C                    | -2.347950084 | 0.006112977  | -0.405949065 |
| N                    | -1.512587496 | -0.175345479 | 4.220894755  | N                    | -1.414324637 | 0.549565734  | 4.240458133  |
| C                    | 0.987043040  | 0.434159730  | 5.187561166  | C                    | 0.940569066  | -0.534183451 | 5.133245961  |
| N                    | 2.908050933  | -0.112770293 | 3.294439772  | N                    | 2.931730103  | -0.341465041 | 3.231205737  |
| O                    | 2.122970207  | 0.180594244  | -5.350913744 | O                    | 1.974772707  | 0.052193798  | -5.421801697 |
| O                    | -4.877991897 | -0.365036559 | -1.154858280 | O                    | -4.915868491 | -0.396526447 | -1.026694734 |
| H                    | 1.201048713  | 2.235902044  | 6.143153124  | H                    | 0.837358860  | -2.388604883 | 6.008900825  |
| H                    | -1.924655614 | 1.925754348  | -3.852200138 | H                    | -2.402352289 | 0.771414535  | -4.179873952 |
| H                    | 4.469444845  | -0.759009416 | -1.426102936 | H                    | 4.549028450  | -0.117159382 | -1.503797051 |
| H                    | -1.774174495 | -2.038391223 | 4.504732647  | H                    | -1.524529042 | 2.344539330  | 4.856264642  |
| CI <sub>7H</sub> (5) |              |              |              |                      |              |              |              |
| N                    | -1.179984126 | 0.861562700  | -2.817042590 |                      |              |              |              |
| C                    | 1.385607855  | 0.125814372  | -3.134589100 |                      |              |              |              |
| N                    | 2.635618273  | -0.299281249 | -0.925153085 |                      |              |              |              |
| C                    | 1.403327518  | -0.157818067 | 1.385282848  |                      |              |              |              |
| C                    | -1.117798157 | 0.300248900  | 1.545199057  |                      |              |              |              |
| C                    | -2.560852673 | 0.793112067  | -0.704598555 |                      |              |              |              |
| N                    | -1.621049236 | 0.386381699  | 4.098512083  |                      |              |              |              |
| C                    | 0.615206793  | -0.067061900 | 5.279363485  |                      |              |              |              |
| N                    | 2.494542449  | -0.380493329 | 3.705079505  |                      |              |              |              |
| O                    | 2.294203777  | -0.008701801 | -5.188792804 |                      |              |              |              |
| O                    | -4.121205989 | -1.298909236 | -2.074075683 |                      |              |              |              |
| H                    | 0.774231812  | -0.160014111 | 7.305192124  |                      |              |              |              |
| H                    | -2.024934714 | 1.355751492  | -4.436604458 |                      |              |              |              |
| H                    | 4.452832506  | -0.793857019 | -1.028005532 |                      |              |              |              |
| H                    | -3.296704096 | 0.610408155  | 4.924516860  |                      |              |              |              |

Table S10: Cartesian coordinates of  ${}^1n\pi^*-S_0$  conical intersection geometries of the 9H-diketo tautomer of xanthine, optimized with the CASSCF/cc-pVDZ method (in au)

| Atom                 | x            | y            | z            | Atom                 | x            | y            | z            |
|----------------------|--------------|--------------|--------------|----------------------|--------------|--------------|--------------|
| CI <sub>9H</sub> (3) |              |              |              | CI <sub>9H</sub> (4) |              |              |              |
| N                    | -1.270591889 | 0.452328017  | -2.932487969 | N                    | -1.255369623 | 0.469354776  | -2.939181778 |
| C                    | 1.303214253  | -0.159490336 | -3.178873899 | C                    | 1.323319954  | -0.129222005 | -3.190826155 |
| N                    | 2.556293921  | -0.467500268 | -0.909709156 | N                    | 2.570838907  | -0.389473999 | -0.926159969 |
| C                    | 1.803824183  | 1.005718965  | 1.220335274  | C                    | 1.787171273  | 0.934940080  | 1.257121016  |
| C                    | -1.142836860 | 0.792337366  | 1.528722520  | C                    | -1.156797825 | 0.736383245  | 1.524426945  |
| C                    | -2.338409534 | 0.467360891  | -0.559640282 | C                    | -2.340178084 | 0.430034195  | -0.573145223 |
| N                    | -1.696256344 | -0.248972170 | 3.972494669  | N                    | -1.715400062 | -0.181255873 | 3.998316222  |
| C                    | 0.441909249  | -0.650001859 | 4.975988454  | C                    | 0.411010598  | -0.561800747 | 5.045821130  |
| N                    | 2.622567602  | 0.202344489  | 3.664567509  | N                    | 2.639186096  | -0.074340469 | 3.621583649  |
| O                    | 2.268906459  | -0.353911301 | -5.205065409 | O                    | 2.283201305  | -0.348219495 | -5.218081514 |
| O                    | -4.712912212 | -0.580836699 | -1.428949037 | O                    | -4.698277609 | -0.587228018 | -1.502179069 |
| H                    | 0.677254349  | -1.547521573 | 6.795264375  | H                    | 0.599200702  | -1.319838880 | 6.932932878  |
| H                    | -1.973044781 | 1.567533097  | -4.295304335 | H                    | -1.957561467 | 1.614179559  | -4.277007764 |
| H                    | 4.412146535  | -0.735003586 | -1.183486410 | H                    | 4.399091861  | -0.841131082 | -1.106672251 |
| H                    | 4.132546475  | -0.937978622 | 3.747793806  | H                    | 3.884893043  | 1.031207401  | 4.528190207  |
| CI <sub>9H</sub> (5) |              |              |              |                      |              |              |              |
| N                    | -1.172890456 | 0.948995845  | -2.790229126 |                      |              |              |              |
| C                    | 1.362957822  | 0.160562842  | -3.143297674 |                      |              |              |              |
| N                    | 2.657501423  | -0.247671514 | -0.934623577 |                      |              |              |              |
| C                    | 1.382972616  | -0.175760395 | 1.349839576  |                      |              |              |              |
| C                    | -1.121552180 | 0.288549730  | 1.596462838  |                      |              |              |              |
| C                    | -2.543276126 | 0.769990188  | -0.684402653 |                      |              |              |              |
| N                    | -1.775014746 | 0.383234030  | 4.128840617  |                      |              |              |              |
| C                    | 0.318544391  | -0.021909704 | 5.327840901  |                      |              |              |              |
| N                    | 2.355840834  | -0.357988168 | 3.732751753  |                      |              |              |              |
| O                    | 2.257398092  | -0.054860342 | -5.192638892 |                      |              |              |              |
| O                    | -4.055356794 | -1.326258897 | -2.149365189 |                      |              |              |              |
| H                    | 0.522821678  | -0.117385603 | 7.349763273  |                      |              |              |              |
| H                    | -2.040509784 | 1.426648526  | -4.403609841 |                      |              |              |              |
| H                    | 4.359603331  | -1.040956989 | -1.113957005 |                      |              |              |              |
| H                    | 4.149720049  | -0.613762247 | 4.238960435  |                      |              |              |              |

Table S11: Mulliken atomic charges on the O<sub>10</sub>, O<sub>11</sub> and N<sub>9</sub> (N<sub>7</sub>) atoms of the 7H-diketo (9H-diketo) tautomer of xanthine for the S<sub>0</sub> and lowest three <sup>1</sup>nπ\* states, calculated at the CASSCF(20,14)(11π3n)/aug-cc-pVDZ level. CASPT2 vertical excitation energies of the <sup>1</sup>nπ\* states ( $\Delta E$ , in eV) are also shown.

| State            | 7H-diketo  |                 |                 |                | 9H-diketo  |                 |                 |                |
|------------------|------------|-----------------|-----------------|----------------|------------|-----------------|-----------------|----------------|
|                  | $\Delta E$ | O <sub>10</sub> | O <sub>11</sub> | N <sub>9</sub> | $\Delta E$ | O <sub>10</sub> | O <sub>11</sub> | N <sub>7</sub> |
| S <sub>0</sub>   |            | <b>-0.72</b>    | <b>-0.85</b>    | <b>-0.83</b>   |            | <b>-0.73</b>    | <b>-0.80</b>    | <b>-0.97</b>   |
| <sup>1</sup> nπ* | 4.91       | -0.73           | <b>-0.47</b>    | -0.81          | 4.90       | -0.74           | <b>-0.45</b>    | -1.01          |
| <sup>1</sup> nπ* | 6.23       | <b>-0.33</b>    | -0.87           | -0.84          | 6.18       | <b>-0.34</b>    | -0.82           | -0.98          |
| <sup>1</sup> nπ* | 6.35       | -0.73           | -0.86           | <b>-0.46</b>   | 6.45       | -0.73           | -0.83           | <b>-0.74</b>   |

Table S12: CC2 vertical excitation energies of the low-lying singlet excited states of xanthine tautomers (in eV)

| State                   | cc-pVDZ | State            | cc-pVTZ | State            | aug-cc-pVDZ | State            | aug-cc-pVTZ |
|-------------------------|---------|------------------|---------|------------------|-------------|------------------|-------------|
| 7H-diketo               |         |                  |         |                  |             |                  |             |
| <sup>1</sup> A' states  |         |                  |         |                  |             |                  |             |
| <sup>1</sup> ππ*        | 5.23    | <sup>1</sup> ππ* | 5.12    | <sup>1</sup> ππ* | 4.92        | <sup>1</sup> ππ* | 4.99        |
| <sup>1</sup> ππ*        | 6.18    | <sup>1</sup> ππ* | 6.11    | <sup>1</sup> ππ* | 5.90        | <sup>1</sup> ππ* | 5.98        |
| <sup>1</sup> ππ*        | 6.78    | <sup>1</sup> ππ* | 6.66    | <sup>1</sup> nσ* | 6.32        | <sup>1</sup> ππ* | 6.44        |
| <sup>1</sup> ππ*        | 6.95    | <sup>1</sup> ππ* | 6.79    | <sup>1</sup> ππ* | 6.36        | <sup>1</sup> nσ* | 6.46        |
| <sup>1</sup> ππ*        | 7.07    | <sup>1</sup> ππ* | 6.94    | <sup>1</sup> ππ* | 6.43        | <sup>1</sup> ππ* | 6.50        |
| <sup>1</sup> A'' states |         |                  |         |                  |             |                  |             |
| <sup>1</sup> nπ*        | 5.24    | <sup>1</sup> nπ* | 5.17    | <sup>1</sup> nπ* | 5.01        | <sup>1</sup> nπ* | 5.06        |
| <sup>1</sup> nπ*        | 6.60    | <sup>1</sup> nπ* | 6.52    | <sup>1</sup> πσ* | 5.46        | <sup>1</sup> πσ* | 5.62        |
| <sup>1</sup> nπ*        | 6.70    | <sup>1</sup> nπ* | 6.59    | <sup>1</sup> πσ* | 5.87        | <sup>1</sup> πσ* | 6.04        |
| <sup>1</sup> nπ*        | 6.98    | <sup>1</sup> nπ* | 6.84    | <sup>1</sup> nπ* | 6.31        | <sup>1</sup> nπ* | 6.37        |
| <sup>1</sup> πσ*        | 7.23    | <sup>1</sup> πσ* | 6.88    | <sup>1</sup> nπ* | 6.42        | <sup>1</sup> nπ* | 6.45        |
| 9H-diketo               |         |                  |         |                  |             |                  |             |
| <sup>1</sup> A' states  |         |                  |         |                  |             |                  |             |
| <sup>1</sup> ππ*        | 5.66    | <sup>1</sup> ππ* | 5.53    | <sup>1</sup> ππ* | 5.30        | <sup>1</sup> ππ* | 5.36        |
| <sup>1</sup> ππ*        | 6.14    | <sup>1</sup> ππ* | 6.04    | <sup>1</sup> ππ* | 5.82        | <sup>1</sup> ππ* | 5.90        |
| <sup>1</sup> ππ*        | 7.08    | <sup>1</sup> ππ* | 6.89    | <sup>1</sup> nσ* | 5.97        | <sup>1</sup> nσ* | 6.13        |
| <sup>1</sup> ππ*        | 7.11    | <sup>1</sup> ππ* | 6.99    | <sup>1</sup> ππ* | 6.44        | <sup>1</sup> ππ* | 6.45        |
| <sup>1</sup> ππ*        | 7.68    | <sup>1</sup> nσ* | 7.34    | <sup>1</sup> nσ* | 6.57        | <sup>1</sup> ππ* | 6.63        |
| <sup>1</sup> A'' states |         |                  |         |                  |             |                  |             |
| <sup>1</sup> nπ*        | 5.32    | <sup>1</sup> nπ* | 5.25    | <sup>1</sup> πσ* | 4.92        | <sup>1</sup> πσ* | 5.10        |
| <sup>1</sup> πσ*        | 6.51    | <sup>1</sup> πσ* | 6.07    | <sup>1</sup> nπ* | 5.08        | <sup>1</sup> nπ* | 5.13        |
| <sup>1</sup> nπ*        | 6.53    | <sup>1</sup> nπ* | 6.46    | <sup>1</sup> πσ* | 5.83        | <sup>1</sup> πσ* | 6.00        |
| <sup>1</sup> nπ*        | 7.01    | <sup>1</sup> nπ* | 6.83    | <sup>1</sup> πσ* | 6.12        | <sup>1</sup> πσ* | 6.23        |
| <sup>1</sup> nπ*        | 7.21    | <sup>1</sup> πσ* | 7.06    | <sup>1</sup> nπ* | 6.23        | <sup>1</sup> nπ* | 6.30        |

Table S13: ADC(2) vertical excitation energies of the low-lying singlet excited states of xanthine tautomers (in eV)

| State                   | cc-pVDZ | State            | cc-pVTZ | State            | aug-cc-pVDZ | State            | aug-cc-pVTZ |
|-------------------------|---------|------------------|---------|------------------|-------------|------------------|-------------|
| 7H-diketo               |         |                  |         |                  |             |                  |             |
| <sup>1</sup> A' states  |         |                  |         |                  |             |                  |             |
| <sup>1</sup> ππ*        | 5.14    | <sup>1</sup> ππ* | 5.03    | <sup>1</sup> ππ* | 4.82        | <sup>1</sup> ππ* | 4.90        |
| <sup>1</sup> ππ*        | 6.12    | <sup>1</sup> ππ* | 6.05    | <sup>1</sup> ππ* | 5.84        | <sup>1</sup> ππ* | 5.93        |
| <sup>1</sup> ππ*        | 6.58    | <sup>1</sup> ππ* | 6.48    | <sup>1</sup> ππ* | 6.16        | <sup>1</sup> ππ* | 6.27        |
| <sup>1</sup> ππ*        | 6.85    | <sup>1</sup> ππ* | 6.69    | <sup>1</sup> nσ* | 6.22        | <sup>1</sup> ππ* | 6.40        |
| <sup>1</sup> ππ*        | 7.00    | <sup>1</sup> ππ* | 6.87    | <sup>1</sup> ππ* | 6.32        | <sup>1</sup> nσ* | 6.44        |
| <sup>1</sup> A'' states |         |                  |         |                  |             |                  |             |
| <sup>1</sup> nπ*        | 4.98    | <sup>1</sup> nπ* | 4.94    | <sup>1</sup> nπ* | 4.75        | <sup>1</sup> nπ* | 4.82        |
| <sup>1</sup> nπ*        | 6.33    | <sup>1</sup> nπ* | 6.29    | <sup>1</sup> πσ* | 5.47        | <sup>1</sup> πσ* | 5.67        |
| <sup>1</sup> nπ*        | 6.60    | <sup>1</sup> nπ* | 6.48    | <sup>1</sup> πσ* | 5.88        | <sup>1</sup> πσ* | 6.10        |
| <sup>1</sup> nπ*        | 6.85    | <sup>1</sup> nπ* | 6.73    | <sup>1</sup> nπ* | 6.02        | <sup>1</sup> nπ* | 6.12        |
| <sup>1</sup> πσ*        | 7.32    | <sup>1</sup> πσ* | 6.97    | <sup>1</sup> nπ* | 6.33        | <sup>1</sup> nπ* | 6.36        |
| 9H-diketo               |         |                  |         |                  |             |                  |             |
| <sup>1</sup> A' states  |         |                  |         |                  |             |                  |             |
| <sup>1</sup> ππ*        | 5.62    | <sup>1</sup> ππ* | 5.49    | <sup>1</sup> ππ* | 5.26        | <sup>1</sup> ππ* | 5.33        |
| <sup>1</sup> ππ*        | 6.12    | <sup>1</sup> ππ* | 6.01    | <sup>1</sup> ππ* | 5.78        | <sup>1</sup> ππ* | 5.86        |
| <sup>1</sup> ππ*        | 6.95    | <sup>1</sup> ππ* | 6.84    | <sup>1</sup> nσ* | 5.89        | <sup>1</sup> nσ* | 6.11        |
| <sup>1</sup> ππ*        | 7.04    | <sup>1</sup> ππ* | 6.85    | <sup>1</sup> ππ* | 6.40        | <sup>1</sup> ππ* | 6.46        |
| <sup>1</sup> ππ*        | 7.57    | <sup>1</sup> nσ* | 7.35    | <sup>1</sup> ππ* | 6.46        | <sup>1</sup> ππ* | 6.60        |
| <sup>1</sup> A'' states |         |                  |         |                  |             |                  |             |
| <sup>1</sup> nπ*        | 5.04    | <sup>1</sup> nπ* | 5.00    | <sup>1</sup> nπ* | 4.79        | <sup>1</sup> nπ* | 4.87        |
| <sup>1</sup> nπ*        | 6.27    | <sup>1</sup> πσ* | 6.16    | <sup>1</sup> πσ* | 4.95        | <sup>1</sup> πσ* | 5.17        |
| <sup>1</sup> πσ*        | 6.61    | <sup>1</sup> nπ* | 6.23    | <sup>1</sup> πσ* | 5.86        | <sup>1</sup> nπ* | 6.07        |
| <sup>1</sup> nπ*        | 6.94    | <sup>1</sup> nπ* | 6.48    | <sup>1</sup> nπ* | 5.96        | <sup>1</sup> πσ* | 6.08        |
| <sup>1</sup> nπ*        | 7.12    | <sup>1</sup> nπ* | 6.99    | <sup>1</sup> πσ* | 6.15        | <sup>1</sup> πσ* | 6.31        |

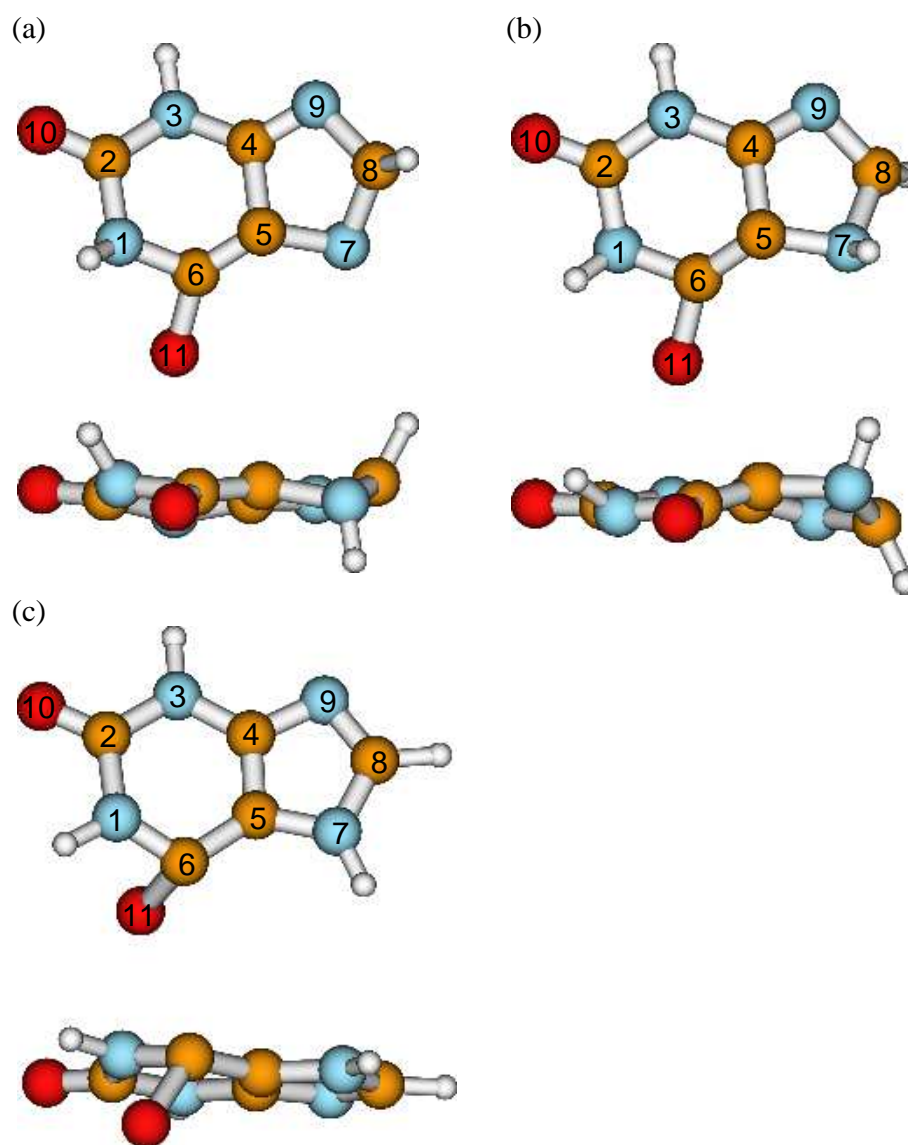

Figure S1:  ${}^1n\pi^*-S_0$  CI geometries of the 7H-diketo tautomer of xanthine, optimized at the CASSCF(10,9/8 $\pi$ 1n)/cc-pVDZ level: CI<sub>7H</sub>(3) (a), CI<sub>7H</sub>(4) (b) and CI<sub>7H</sub>(5) (c).

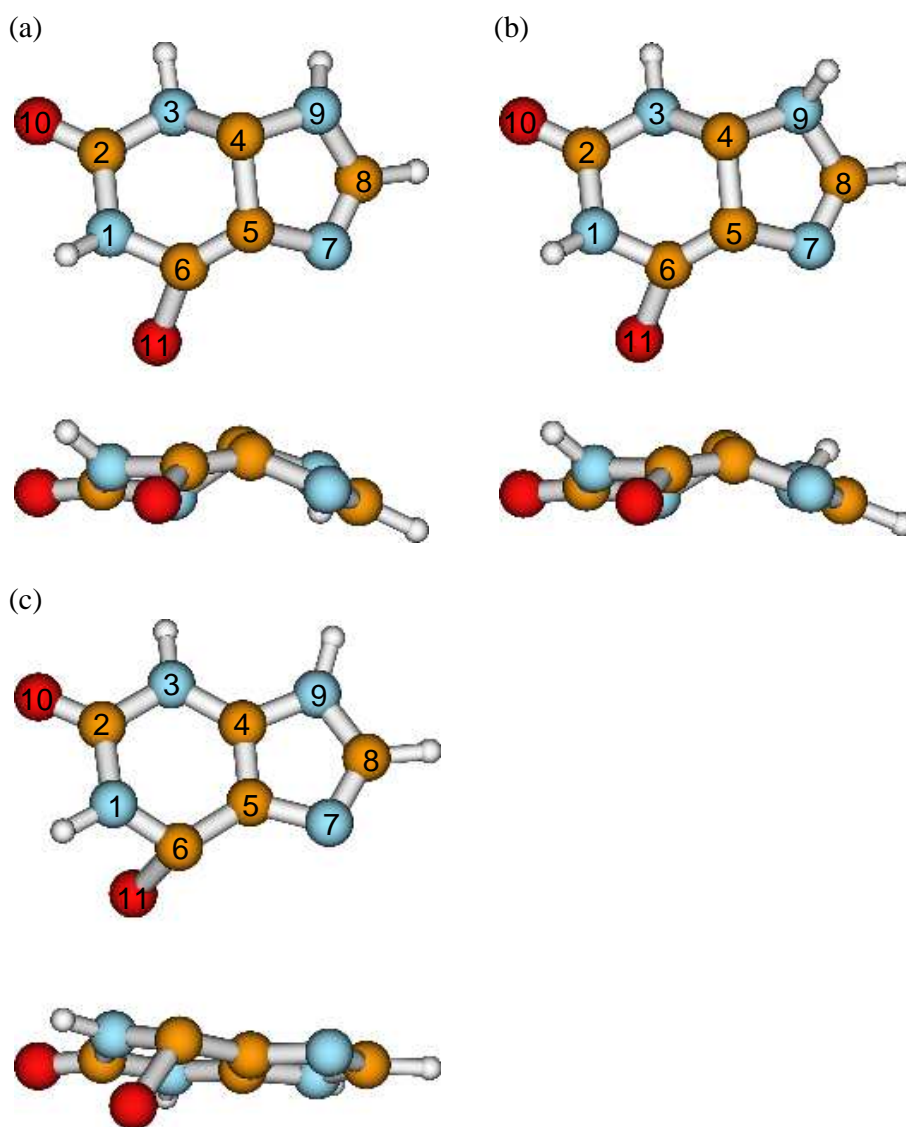

Figure S2:  ${}^1n\pi^*-S_0$  CI geometries of the 9H-diketo tautomer of xanthine, optimized at the CASSCF(10,9/8 $\pi$ 1n)/cc-pVDZ level:  $CI_{9H}(3)$  (a),  $CI_{9H}(4)$  (b) and  $CI_{9H}(5)$  (c).
